# Supplementary material
Source: PubMed Central journal article supplement (PMC7930420)
Supplement: ONCO-26-e473-s001.pdf [file ONCO-26-e473-s001.pdf]

Supplemental Table for:  
The Impact of Human Papillomavirus Infection on Skin Cancer: A Population-based Cohort Study  
Yao-min Hung et al.

Supplement Table 1. The baseline characteristics in sensitivity analysis.

| Variable                | Propensity Score Matching |        |         |        | P-value |
|-------------------------|---------------------------|--------|---------|--------|---------|
|                         | non-HPV                   |        | HPV     |        |         |
|                         | n                         | %      | n       | %      |         |
|                         | N=107676                  |        | N=26919 |        |         |
| Gender                  |                           |        |         |        | 0.40    |
| Female                  | 56296                     | 52%    | 13997   | 52%    |         |
| Male                    | 51380                     | 48%    | 12922   | 48%    |         |
| Age, year               |                           |        |         |        | 1.000   |
| 14-30                   | 45094                     | 42%    | 11249   | 42%    | 0.90    |
| 30-40                   | 19729                     | 18%    | 4906    | 18%    |         |
| 40-50                   | 17782                     | 17%    | 4438    | 16%    |         |
| >50                     | 25071                     | 23%    | 6326    | 24%    |         |
| mean,(SD)               | 37.5                      | (17.2) | 37.5    | (17.3) | 0.74    |
| Comorbidities           |                           |        |         |        |         |
| Hypertension            | 17843                     | 17%    | 4474    | 17%    | 0.85    |
| Diabetes                | 8513                      | 8%     | 2159    | 8%     | 0.54    |
| Hyperlipidemia          | 16313                     | 15%    | 4126    | 15%    | 0.47    |
| CKD                     | 1114                      | 1.0%   | 334     | 1.2%   | 0.004   |
| Peptic ulcer disease    | 24652                     | 23%    | 6189    | 23%    | 0.74    |
| Asthma                  | 9703                      | 9%     | 2734    | 10%    | <0.001  |
| COPD                    | 9839                      | 9%     | 2509    | 9%     | 0.36    |
| Helicobacter pylori     | 317                       | 0.3%   | 106     | 0.4%   | 0.01    |
| HBV                     | 4439                      | 4.1%   | 1193    | 4.4%   | 0.02    |
| HCV                     | 854                       | 0.79%  | 264     | 0.98%  | 0.003   |
| IBD                     | 2792                      | 3%     | 722     | 3%     | 0.42    |
| Alcohol-related illness | 2081                      | 2%     | 543     | 2%     | 0.38    |
| HIV                     | 83                        | 0.08%  | 31      | 0.12%  | 0.07    |
| Autoimmune disease      | 3303                      | 3%     | 869     | 3%     | 0.18    |

CKD: Chronic Kidney Disease; COPD: Chronic Obstructive Pulmonary Disease;  
HBV: Hepatitis B Virus; HCV: Hepatitis C Virus; IBD: Inflammatory Bowel Disease.
